# Supplementary material for: Rice NAD+-dependent histone deacetylase OsSRT1 represses glycolysis and regulates the moonlighting function of GAPDH as a transcriptional activator of glycolytic genes
Source: PubMed Central journal article supplement — Nucleic Acids Res. 2017 Sep 13;45(21):12241–55. doi: 10.1093/nar/gkx825 (PMC5716216; doi:10.1093/nar/gkx825), 2017-09-13

**Table S1. Metabolic pathways enriched in upregulated genes by *OsSRT1* RNAi**

| KEGG ID  | Pathway name                            | P-value  |
|----------|-----------------------------------------|----------|
| osa00051 | Fructose and mannose metabolism         | 0.00515  |
| osa00010 | Glycolysis/Gluconeogenesis              | 0.00528  |
| osa00480 | Glutathione metabolism                  | 0.013078 |
| osa04145 | Phagosome                               | 0.014308 |
| osa00305 | Tyrosine metabolism                     | 0.01998  |
| osa00940 | Phenylpropanoid biosynthesis            | 0.020105 |
| osa00030 | Pentose phosphate pathway               | 0.02298  |
| osa00710 | Carbon fixation photosynthetic organism | 0.024823 |

**Table S2. OsGAPDH1 peptides Lys modification identified by mass spectrometry.**

| peptide                             | q-value |
|-------------------------------------|---------|
| AVGKVLPLDNGKLTGMSFR                 | 0.0016  |
| IKSKTLLLGEKPVTVFGIR                 | 0.0000  |
| IKIGINGFGR                          | 0.0000  |
| KVVISAPSK                           | 0.0000  |
| LKGIIGYVEEDLVSTDFVGDSR              | 0.0000  |
| SAIKSASEGKLK                        | 0.0000  |
| TLLLGEKPVTVFGIR                     | 0.0000  |
| TVDGPSSKDWR                         | 0.0000  |
| VIHDNFGIIEGLMTTVHAIATQKTVDGPSSK     | 0.0086  |
| VLPDLNGKLTGMSFR                     | 0.0030  |
| VVISAPSKDAPMFVCGVNEDKYTSDIDIVSNASCT | 0.0000  |
| YDTVHGQWKHSDIK                      | 0.0000  |
| AASFNIIPSSTGAAKAVGK                 | 0.0000  |
| IEKAASYDAIK                         | 0.0000  |
| NPDEIPWAEAGA EYVVESTGVFTDKEK        | 0.0000  |
| AASYDAIKSAIK                        | 0.0000  |

**Table S3. Summary of glycolytic genes used in the study**

| <b>Locus</b>   | <b>Annotation</b>                                              | <b>Gene name</b> |
|----------------|----------------------------------------------------------------|------------------|
| LOC_Os01g09570 | ATP-dependent 6-phosphofructokinase 6                          | 6-PFK 6          |
| LOC_Os02g32490 | Acetyl-coa synthetase                                          | AcCoA<br>Syn     |
| LOC_Os04g38530 | aldose 1-epimerase, putative, expressed                        | Ald-ep           |
| LOC_Os04g38540 | aldose 1-epimerase, putative, expressed                        | Ald-ep           |
| LOC_Os05g36270 | fructose-1,6-bisphosphatase, putative, expressed               | F-1,6-BP         |
| LOC_Os06g45590 | glyceraldehyde-3-phosphate dehydrogenase GAPCP1, chloroplastic | GAPCP1           |
| LOC_Os09g30240 | ATP-dependent 6-phosphofructokinase 2                          | 6-PFK 2          |
| LOC_Os07g26540 | hexokinase, putative, expressed                                | HXK1             |
| LOC_Os08g03290 | glyceraldehyde-3-phosphate dehydrogenase, putative, expressed  | GAPDH1           |

**Table S4 Primers for qPCR, genotyping and amino acid mutagenesis**

| Pimer name      | Sequence (5'-3')                                                       |
|-----------------|------------------------------------------------------------------------|
| LOC_Os01g09570F | TACTGCACCCTGCTAGCTC                                                    |
| LOC_Os01g09570R | CTCCGTGATTCTGTAGAACG                                                   |
| LOC_Os02g32490F | GTTGAGCATGAAGTGAAAGG                                                   |
| LOC_Os02g32490R | ATGAGGCTTTTCCGTAGTTC                                                   |
| LOC_Os04g38530F | GTGAACCACCCCAACTTC                                                     |
| LOC_Os04g38530R | AGAACGAGAACTTGTACACCAT                                                 |
| LOC_Os04g38540F | CAAGGTGTACCAGCAGTACG                                                   |
| LOC_Os04g38540R | GAGAACTTGAAGGCCATGT                                                    |
| LOC_Os05g36270F | CTGGGGAGCTATGATGACG                                                    |
| LOC_Os05g36270R | TGGTGAAGCCGTACCGTGT                                                    |
| LOC_Os06g45590F | CGAATGATTTCAATTGGTGAC                                                  |
| LOC_Os06g45590R | TTGTCGTACCAAGAGACGAG                                                   |
| LOC_Os09g30240F | ATCAGCCCGACTTTATCCG                                                    |
| LOC_Os09g30240R | CTGGTTCAACCCAAACCAA                                                    |
| LOC_Os07g26540F | AGCAGACCTACGAGAAGCTCAT                                                 |
| LOC_Os07g26540R | CCTCCCGATCTTCTTCAGGAT                                                  |
| LOC_Os08g03290F | GATAACTTTGTCAAGCTTGTGCG                                                |
| LOC_Os08g03290R | CAGCATAGACAAAGCATAACCG                                                 |
| GAPDHmutantF    | TCAAATGCTAGCTGCACCAC                                                   |
| GAPDHmutantR    | GCTTCCCTCTGATGCAGAC                                                    |
| N               | AATCCAGATCCCCCGAATTA                                                   |
| qRTActin1-F     | TGTATGCCAGTGGTCGTACCA                                                  |
| qRTActin1-R     | CCAGCAAGGTCGAGACGAA                                                    |
| R(57/74)-F      | CAATGGAGGCACAGCGACATCAAGATCAAGGACTC<br>CAAGACTCTGCTCTTGGGCGAGAGGCCGGTC |
| R(57/74)-R      | GACCGGCCTCTCGCCCAAGAGCAGAGTCTTGGAGT<br>CCTTGATCTTGATGTCGCTGTGCCTCCATTG |
| R(120)-F        | GGTGCCAAGAGGGTTGTCATC                                                  |
| R(120)-R        | GATGACAACCCTCTTGGCACC                                                  |
| R(217)-F        | GGTGCTGCCAGAGCTGTTGGC                                                  |
| R(217)-R        | GCCAACAGCTCTGGCAGCACC                                                  |
| R(261/265)-F    | CTATCAGGAGTGCTATCAGGTCTGC                                              |
| R(261/265)-R    | GCAGACCTGATAGCACTCCTGATAG                                              |

**Table S5 Primers for CHIP-PCR**

| Pimer name            | Sequence (5'-3')      |
|-----------------------|-----------------------|
| LOC_Os01g09570ChIP-F  | GCACACACATCTTCTCTAG   |
| LOC_Os01g09570ChIP-R  | GTGCTTCTGGTTTGCGG     |
| LOC_Os02g32490ChIP-F  | CCGAATAAAAATTAACAAAC  |
| LOC_Os02g32490ChIP-R  | CGCTGAATTGTAAAAAAG    |
| LOC_Os04g38530ChIP-F  | GCGAGCGAATATTCGCCG    |
| LOC_Os04g38530ChIP-R  | GATCCGTGCCACGCGGCC    |
| LOC_Os04g38540ChIP-F  | CGTTTCAGTTTCTTTTTTCC  |
| LOC_Os04g38540ChIP-R  | GATGACAATTTGTCATTGG   |
| LOC_Os05g36270ChIP-F  | GGAAGAAGGGGAGGTGATC   |
| LOC_Os05g36270ChIP-R  | CGTTGGCAAGCCGCGTCCGG  |
| LOC_Os06g45590ChIP-F  | GTAAAGAGAGAACAAC      |
| LOC_Os06g45590ChIP-R  | TTAGATTGTTAATAACATG   |
| LOC_Os09g30240ChIP-F  | GTGGGACCAAGAGAGTCG    |
| LOC_Os09g30240ChIP-R  | GGGCTCGCGTTTATGGC     |
| LOC_Os07g26540ChIP-F  | CGAGAGGTGAAACATGTGA   |
| LOC_Os07g26540ChIP-R  | CAACAGGAGACTGCTACAGG  |
| LOC_Os08g03290ChIP-F  | CGTCCTCGCATCTCCACT    |
| LOC_Os08g03290ChIP-R  | GCGAAGCACCAGCAGTAA    |
| LOC_Os01g09570CHIP-2F | TCGAAGTGAAGGAGTCCCG   |
| LOC_Os01g09570CHIP-2R | CTTCTTCTTCATCGCCAC    |
| LOC_Os02g32490CHIP-2F | AGCCATCGCACTCTGCA     |
| LOC_Os02g32490CHIP-2R | TGGCGGTCGTCTTCCTC     |
| LOC_Os04g38530CHIP-2F | GAGACGCCTTGGGAGCA     |
| LOC_Os04g38530CHIP-2R | GCCGGATGGACGGATAT     |
| LOC_Os04g38540CHIP-2F | CGCTGCGACTTGAGGACA    |
| LOC_Os04g38540CHIP-2R | CCAGCCTGGTTACGGACA    |
| LOC_Os05g36270CHIP-2F | CGCCGCTACCTCCTCAT     |
| LOC_Os05g36270CHIP-2R | TGCTCCTTGCGAAAACG     |
| LOC_Os06g45590CHIP-2F | TGTTGTTTCGTATGGCGATGT |
| LOC_Os06g45590CHIP-2R | GCGAACGAATCTCAACTGAA  |
| LOC_Os09g30240CHIP-2F | GCCGCACATGACCACCA     |
| LOC_Os09g30240CHIP-2R | GATCGGGTTCGGGATGG     |
| LOC_Os07g26540ChIP-2F | GATCGCCAAGAAACCTTC    |
| LOC_Os07g26540ChIP-2R | CGTCACCACCTTCTGATCT   |
| LOC_Os08g03290CHIP-2F | GTTTGTGCTGTGCTGGGTG   |
| LOC_Os08g03290CHIP-2R | CGATCCTTCCGAAACCTGA   |
| ChIPActin1F           | TGCGTGTCTCTTCTCATCT   |
| ChIPActin1R           | AAGGCGAATGAAGCGAAAAG  |

**Table S5 Primers for CHIP-PCR (continue)**

| Pimer name            | Sequence (5'-3')       |
|-----------------------|------------------------|
| LOC_Os01g09570CHIP-3F | CCGACAGCCCGCGTCGACC    |
| LOC_Os01g09570CHIP-3R | AGGAGGGAGGGCCGCAAC     |
| LOC_Os01g09570CHIP-4F | ATGTTTTTTTTGGCCTGTG    |
| LOC_Os01g09570CHIP-4R | ACATTTGCTTAAACATTATC   |
| LOC_Os02g32490CHIP-3F | CAGCGAGCAATCGGGTG      |
| LOC_Os02g32490CHIP-3R | CATTACTCGTCATAAATTTG   |
| LOC_Os02g32490CHIP-4F | GGGACATGAATATCAATC     |
| LOC_Os02g32490CHIP-4R | AACCTTTAGCACATCAC      |
| LOC_Os04g38530CHIP-3F | GACACAAAAGCCATCCAGATG  |
| LOC_Os04g38530CHIP-3R | GATCGATGGTACATGGACGG   |
| LOC_Os04g38530CHIP-4F | GTCATATTTTCACTGTTTA    |
| LOC_Os04g38530CHIP-4R | TGCTGTTCTACAATCCATA    |
| LOC_Os04g38540CHIP-3F | GTGCGAGGAAGACGGTCG     |
| LOC_Os04g38540CHIP-3R | GACGGTACCTTTGGAATC     |
| LOC_Os04g38540CHIP-4F | GTACTIONTGTCTGATCAAGA  |
| LOC_Os04g38540CHIP-4R | AAAATTCCACCATCTTTTTG   |
| LOC_Os05g36270CHIP-3F | CGTCAACAAGGCCGGCCT     |
| LOC_Os05g36270CHIP-3R | CATGGATTTGTGTGGAGGAAC  |
| LOC_Os05g36270CHIP-4F | CAGCCACGAGTTCGACAAG    |
| LOC_Os05g36270CHIP-4R | ATCGATATTTGAGGAGCC     |
| LOC_Os06g45590CHIP-3F | ACGTGACTTCTCTTTTTGG    |
| LOC_Os06g45590CHIP-3R | TTATTGAGGATTGACTCCG    |
| LOC_Os06g45590CHIP-4F | AGATTATTCGAATTCCTTG    |
| LOC_Os06g45590CHIP-4R | CACAGAGCAAAAACCACA     |
| LOC_Os09g30240CHIP-3F | GAGAGCTCGTCGTCGGGCT    |
| LOC_Os09g30240CHIP-3R | CGAGCGGGACGACCTCGT     |
| LOC_Os09g30240CHIP-4F | ACTGCTGCCTCATCCCGGA    |
| LOC_Os09g30240CHIP-4R | CTTGGGATGAGACGTTGGC    |
| LOC_Os07g26540CHIP-3F | CTGTGCATCTTTGCTACGTTG  |
| LOC_Os07g26540CHIP-3R | GCAACGGAAAAATAATAGGG   |
| LOC_Os07g26540CHIP-4F | TCTCCTTCCCCGTGCACCAAA  |
| LOC_Os07g26540CHIP-4R | TGCAGCGCCGCCACGACGTCCT |
| LOC_Os08g03290CHIP-3F | GTATGTGTCCAAAGATTCTG   |
| LOC_Os08g03290CHIP-3R | TGTATGACAGGTGGGATCA    |
| LOC_Os08g03290CHIP-4F | CTACTGCATATGGCTTTGA    |
| LOC_Os08g03290CHIP-4R | TTCCATTGGCCGTGCACGGTAT |

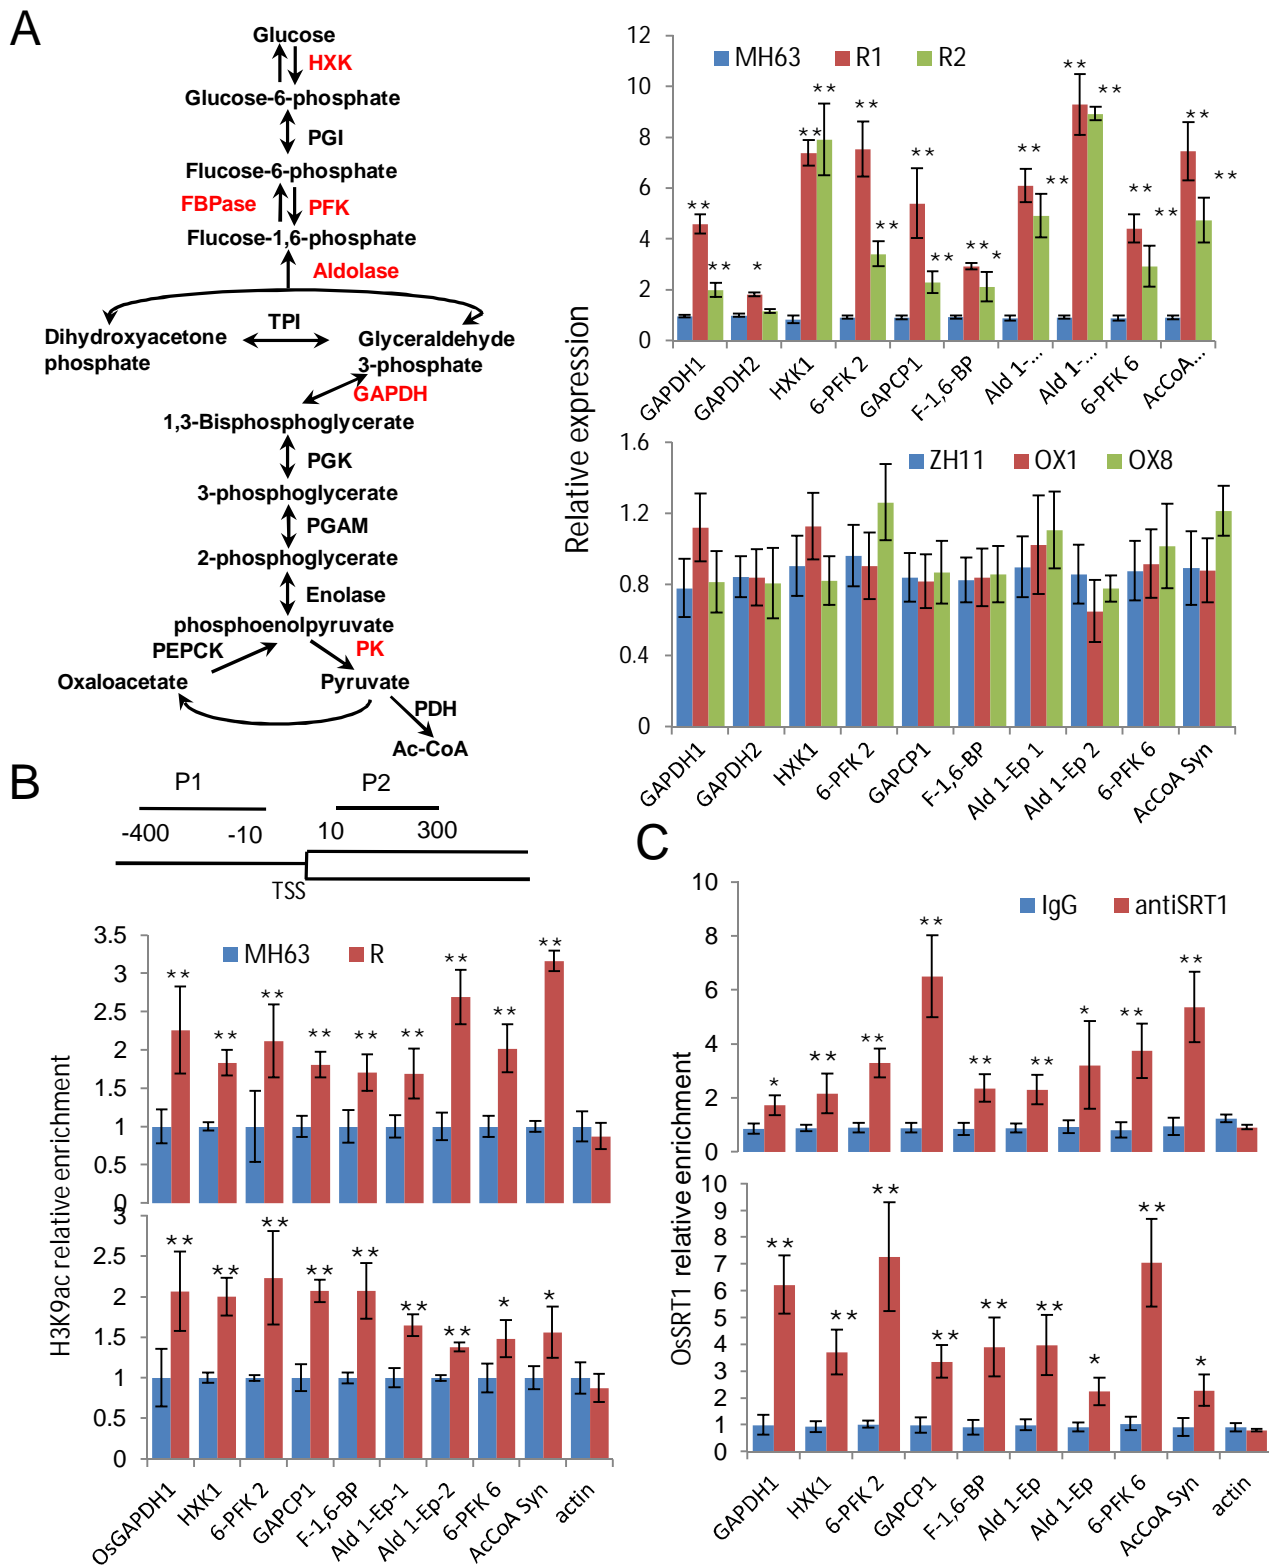

**Figure S1. OsSRT1 represses glycolytic gene expression.** (A) Left, analyzed genes in glycolysis pathway are indicated in red. Right, transcript levels of the genes in two *OsSRT1*RNAi lines (R1, R2) compared to wild type seedlings. (B) H3K9ac levels of glycolytic genes in wild type (MH63) and combined RNAi lines R1 and R2 (R) detected by ChIP-PCR. P1 is located between -400 to -10 relative to TSS. P2 is located between +10 to +300 relative to TSS. The exact positions of the primers are indicated in Table S2. (C) Enrichment of OsSRT1 protein on glycolytic gene loci in wild type plants by ChIP-PCR using anti-OsSRT1 and IgG as controls. The used primer sets are the same as in (B). Bars represent means $\pm$ SD of three biological replicates of the RT-PCR and ChIP-PCR experiments. Significance of differences are indicated (\*\*  $p < 0.01$ ; \*  $p < 0.05$ ).

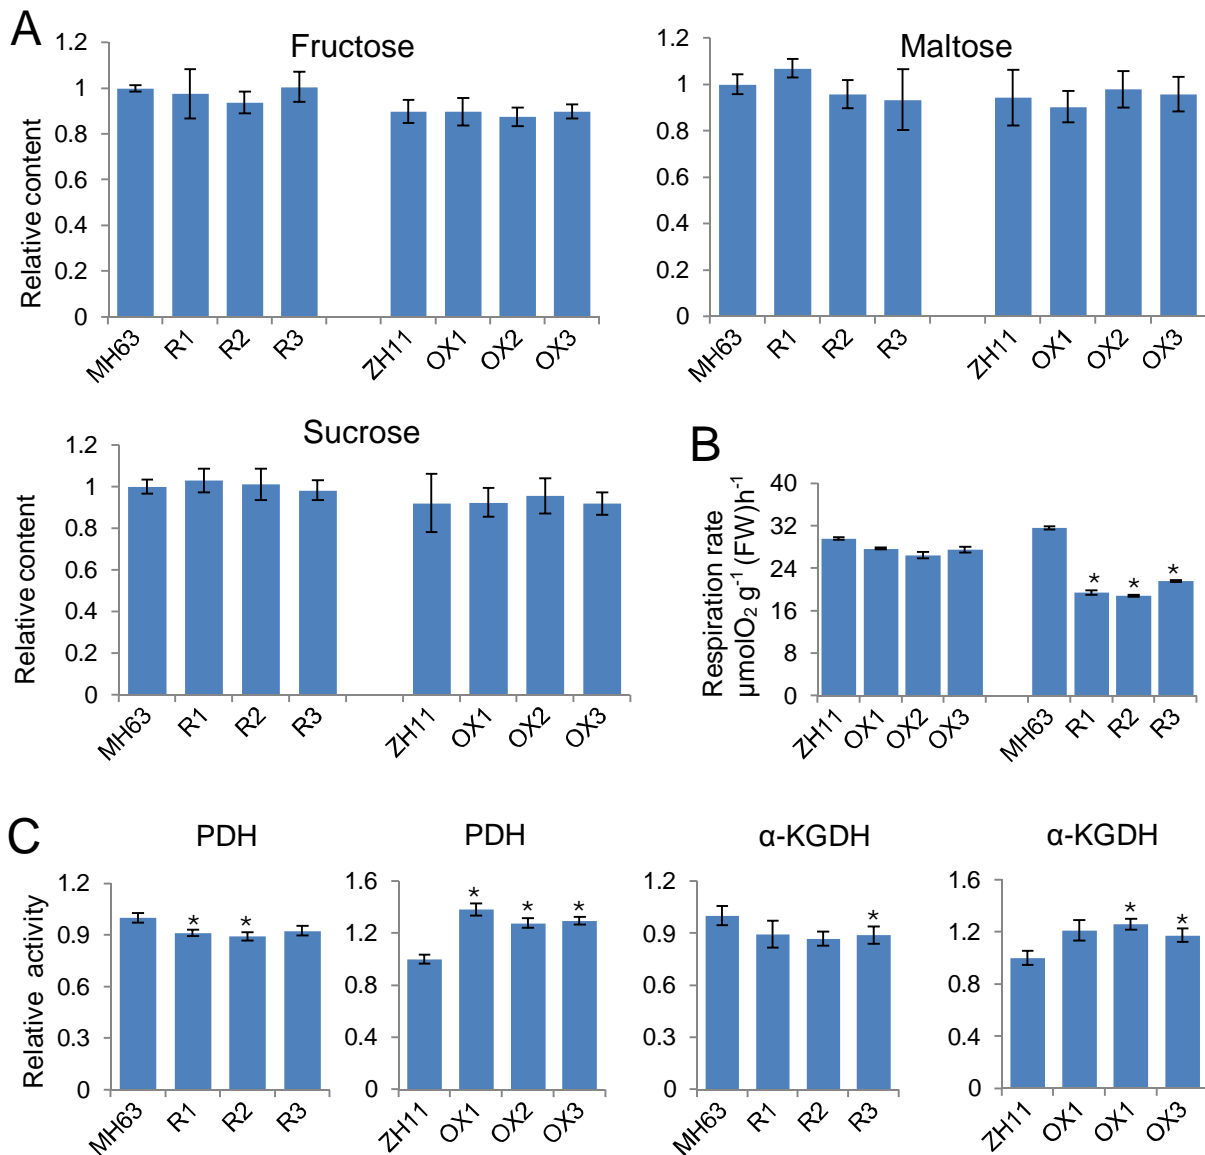

**Figure S2. *OsSRT1* RNAi and over-expression effects on sugar accumulation and mitochondrial respiration.** (A) Sugar contents in *OsSRT1* transgenic (RNAi, over-expression) plants compared to the respective wild type (MH63 and ZH11). (B) Mitochondrial respiration rates in *OsSRT1* RNAi and over-expression leaves compared to the respective wild type, measured 30 min after light to dark transition. (C) Activities of pyruvate dehydrogenase and  $\alpha$ -ketoglutarate dehydrogenase in *OsSRT1* transgenic plants compared to wild type. Bars= means  $\pm$  SD of 3 biological replicates (each replicates with 3 technical repetitions). Significances of differences between wild type and transgenic lines are indicated (\* P value < 0.05, Chi-2 tests).



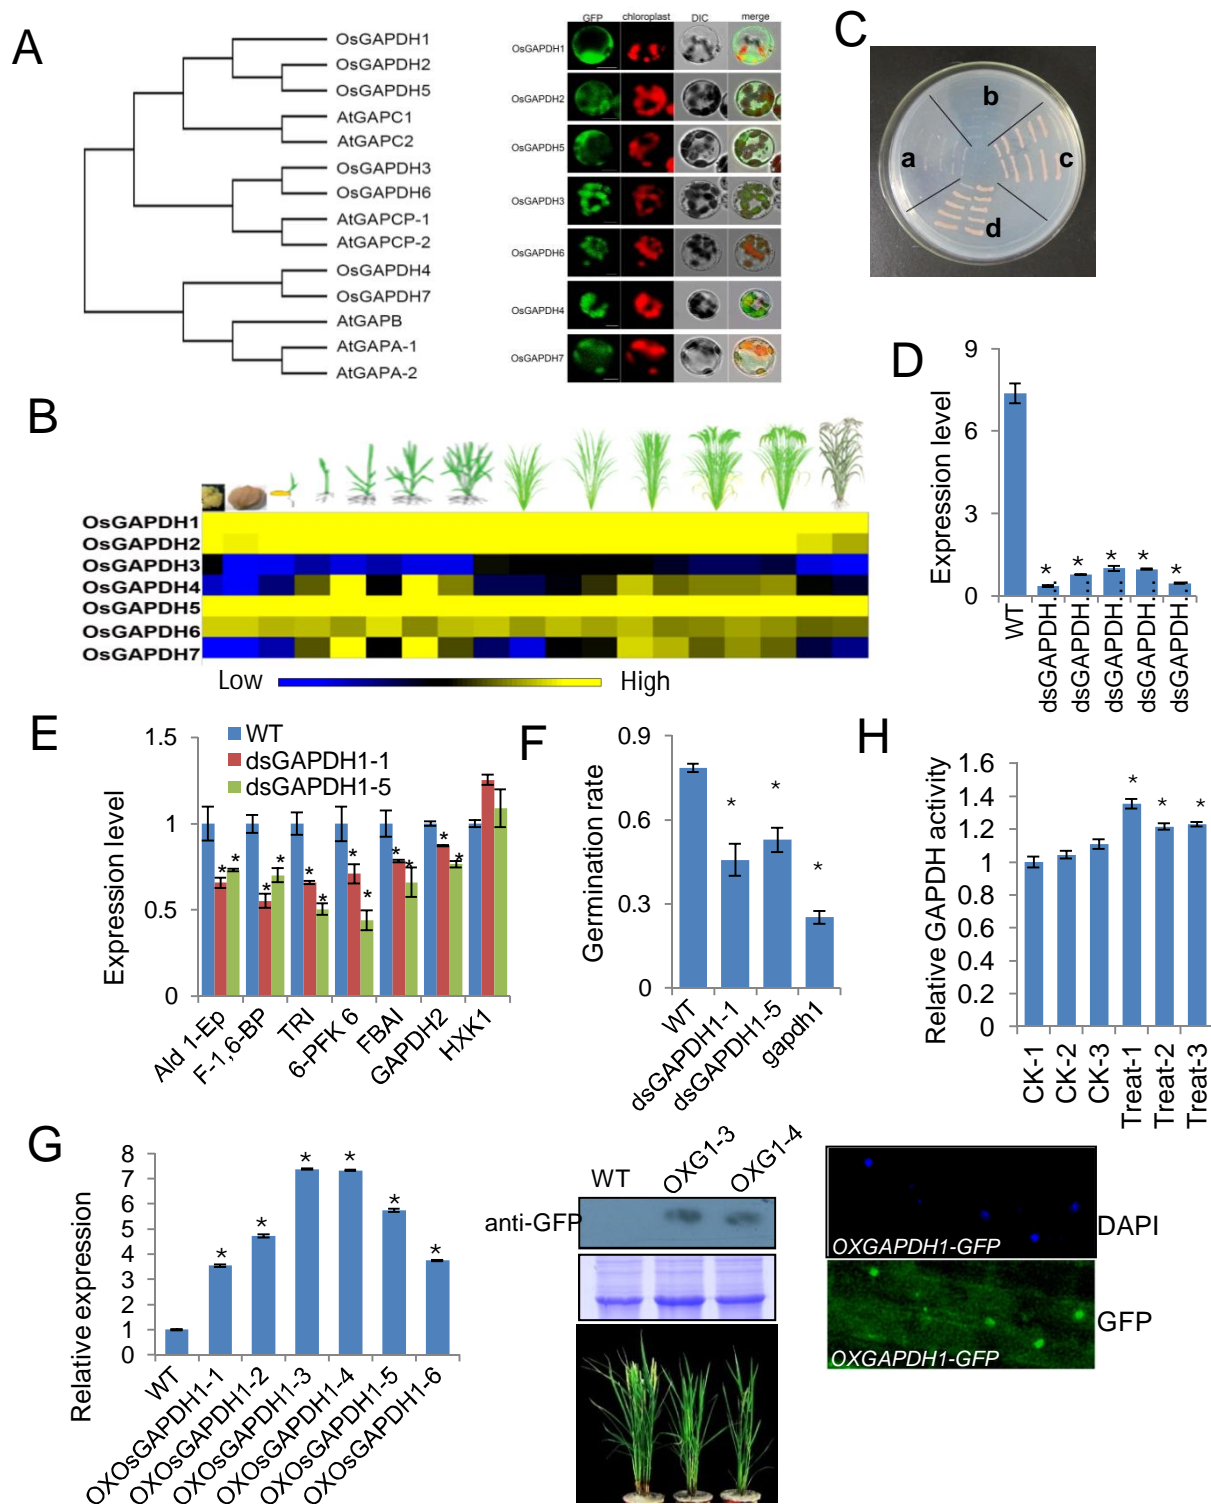

**Figure S3. Rice GAPDH genes and OsGAPDH1 RNAi and over-expression lines.** (A) Phylogenetic relationship of rice and Arabidopsis GAPDH gene families and the Subcellular localization of rice GAPDH-GFP proteins. (B) Expression profiles of rice GAPDH genes at different developmental stages. (C) Protein interaction between OsGAPDH1 and OsGAPDH2 in yeast two hybrid assays. (D) Transcript levels (relative to Actin1) of *OsGAPDH1* in wild type and 5 RNAi (ds) lines. (E) Transcript levels of glycolytic genes in two RNAi lines compared to wild type. (F) Seed germination rates of two RNAi lines and the T-DNA mutant compared to wild type. (G) Production of *OsSRT1* over-expression plants. Left, *OsGAPDH1* transcript levels in *35S::OsGAPDH1-GFP* transgenic lines. Middle, protein level of *OsGAPDH1-GFP* in two line and phenotype at mature stage. Right, detection of *OsGAPDH1-GFP* in root cells (upper part, DAPI; lower part, GFP fluorescence). (H) Relative GAPDH activity in 12 d seedlings treated with or without 0.1%  $H_2O_2$ . Bars are means  $\pm$  SD of three biological replicates. Significances of difference are indicated by \* ( $p < 0.01$ ).

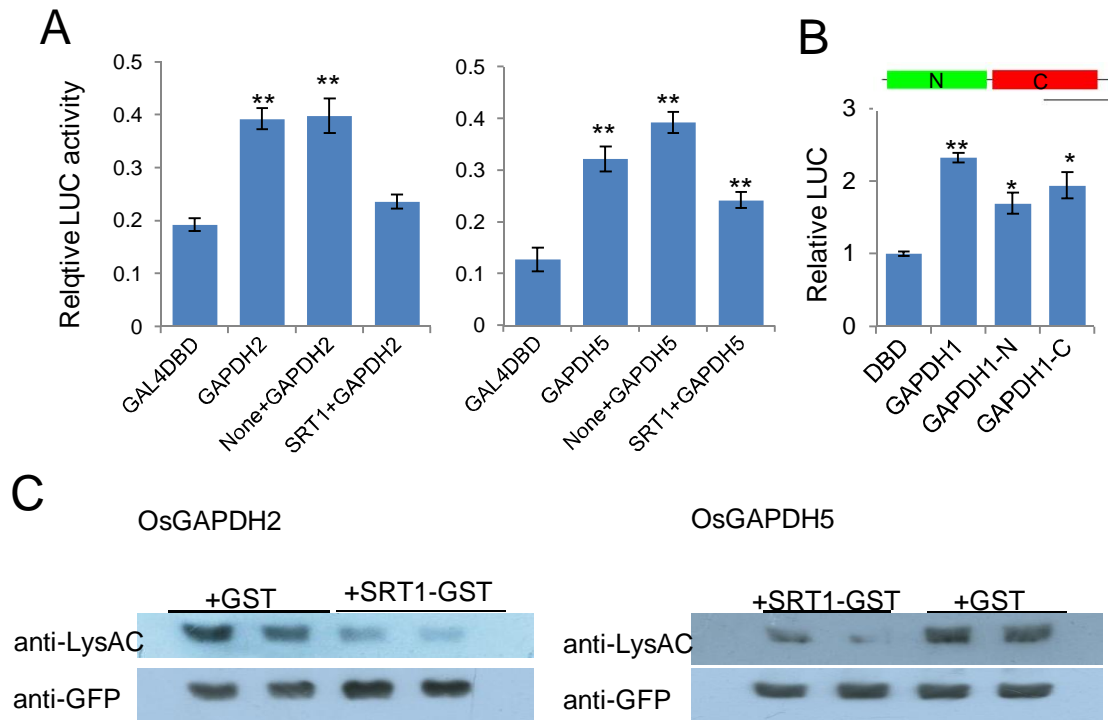

**Figure S4. OsSRT1-regulated transcriptional function and lysine deacetylation of rice GAPDH proteins.** (A) Transactivation of UAS reporter promoters (described in Figure 4A) by OsGAPDH2, and OsGAPDH5 fused with DBD in the presence or absence of OsSRT1 assayed in transfected tobacco protoplasts. (B) Deletion analysis of OsGAPDH1 transcription activity. Grey bar=100 amino acids. (C) E coli-produced OsSRT1-GST protein deacetylates tobacco cell –produced OsGAPDH2-GFP and OsGADH5-GFP in vitro. Anti-GFP was used for loading controls and anti-Lys detected lysine acetylation levels of OsGAPDH1-GFP in the absence or presence of OsSRT1-GST. Significances of differences between wild type and transgenic lines are indicated (\* P value < 0.05; \*\* P value < 0.01).

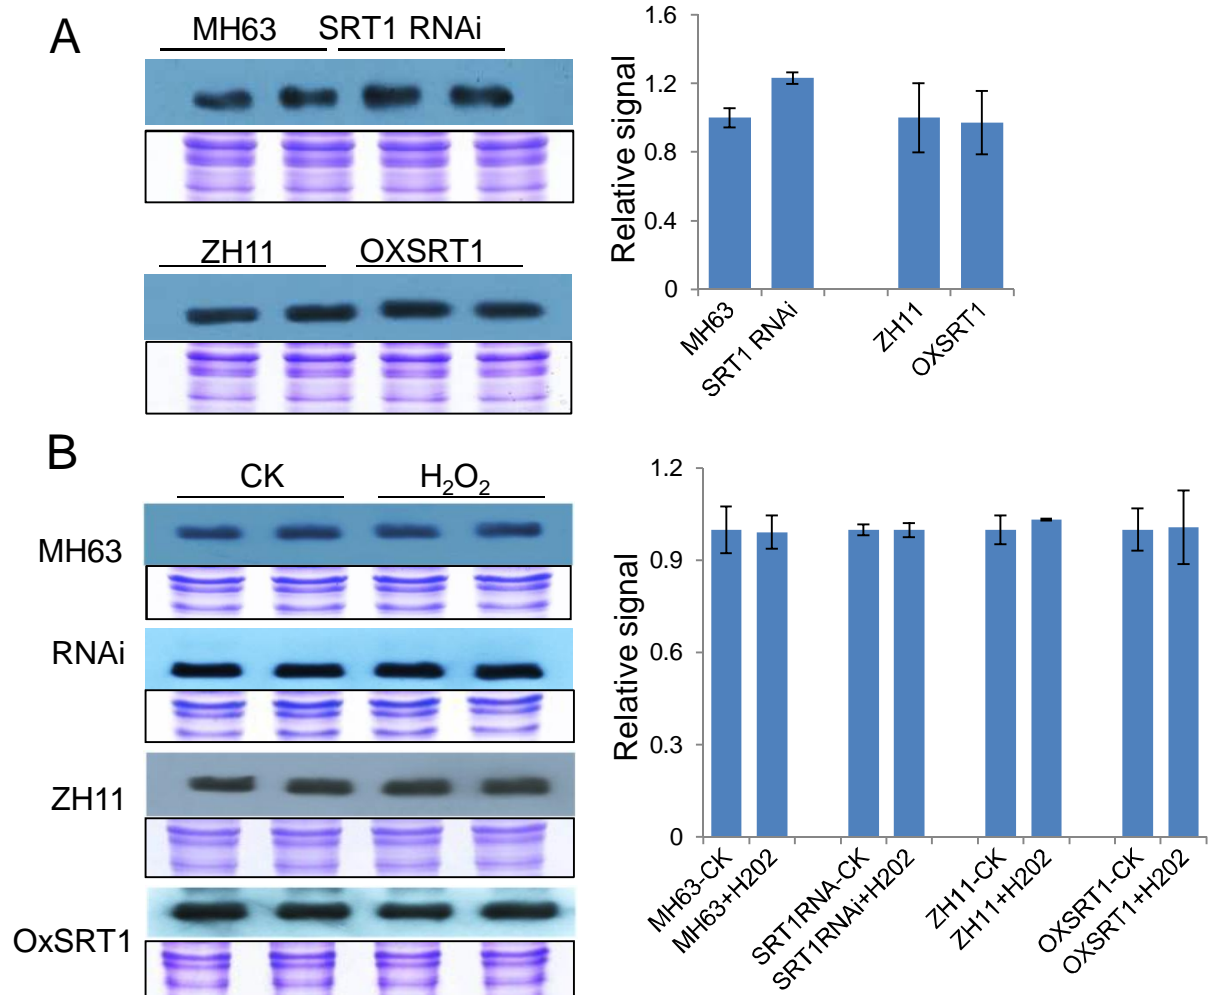

**Figure S5. Relative endogenous GAPDH protein levels.** GAPDH protein levels in Wild type (ZH11, MH63), SRT1 RNAi and overexpression (Ox) seedling leaves under normal growth conditions (A) and treated with or without H<sub>2</sub>O<sub>2</sub> (0.1 %) during 30 min (B) were detected by immunoblots using anti-GAPDH antibody. The bands were quantified by the ImageJ program. Bars are means+/-SD from three measures of each of the two repeats.

Supplemental Data Set 1. MS spectra of 16 GAPDH1 peptides

### AASFNIIPSSTGAAKAVGK

z=+2, Mono m/z=895.49689 Da, MH+=1789.98650 Da, Match Tol.=0.02 Da

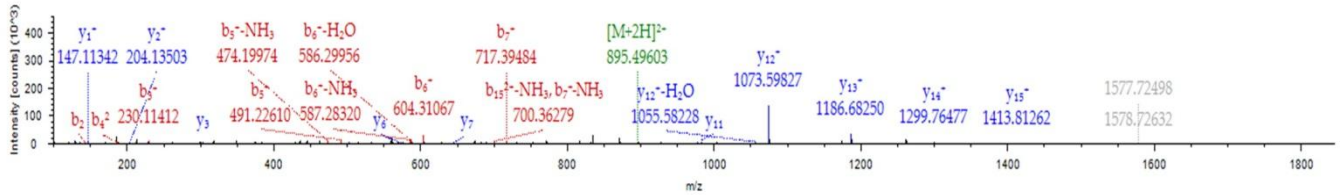

### AASFNIIPSSTGAAK (ac) AVGK

z=+2, Mono m/z=916.50293 Da, MH+=1831.99858 Da, Match Tol.=0.02 Da

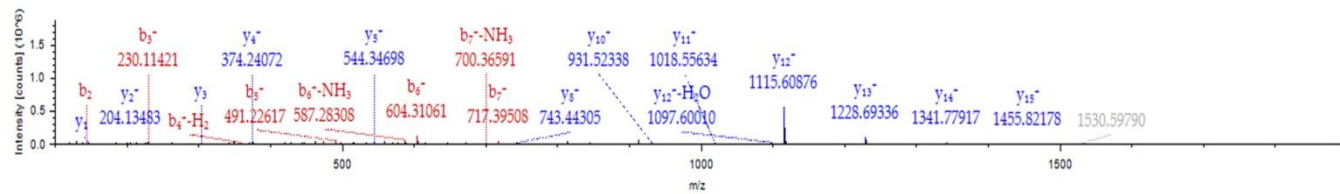

### IEKAASYDAIK

z=+2, Mono m/z=604.83197 Da, MH+=1208.65666 Da, Match Tol.=0.02 Da

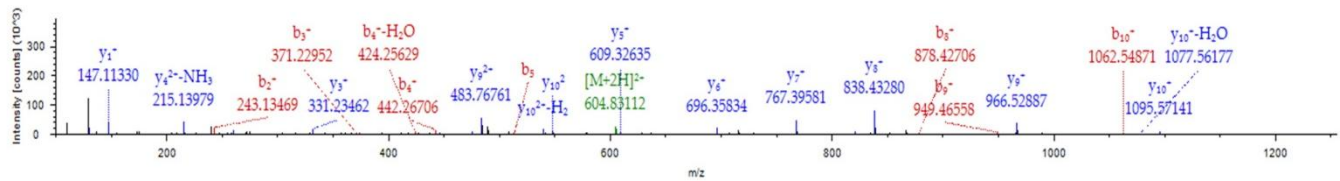

### IEK (ac) AASYDAIK

z=+2, Mono m/z=625.83655 Da, MH+=1250.66582 Da, Match Tol.=0.02 Da

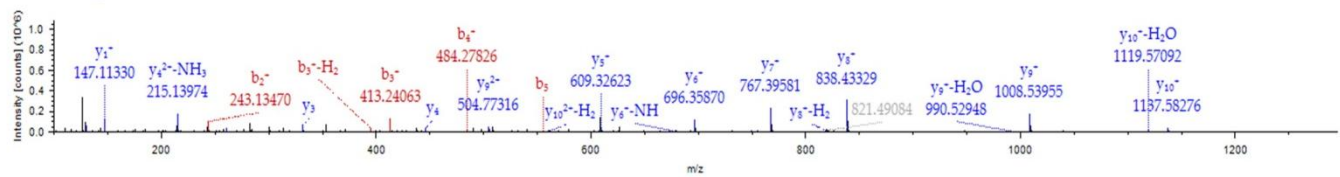

# AVGKVLPLNGKLTGMSFR

z=+3, Mono m/z=668.37726 Da, MH+=2003.11722 Da, Match Tol.=0.02 Da

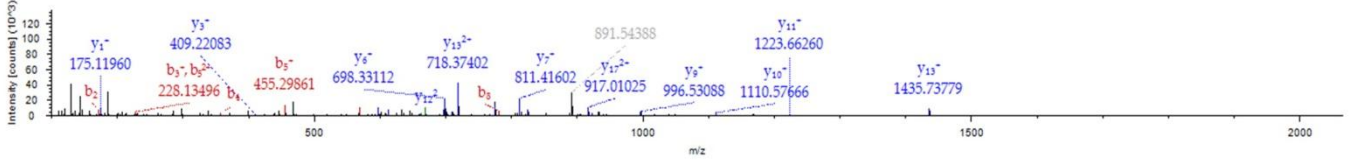

# AVGK(ac)VLPDLNGKLTGMSFR

z=+3, Mono m/z=682.37897 Da, MH+=2045.12235 Da, Match Tol.=0.02 Da

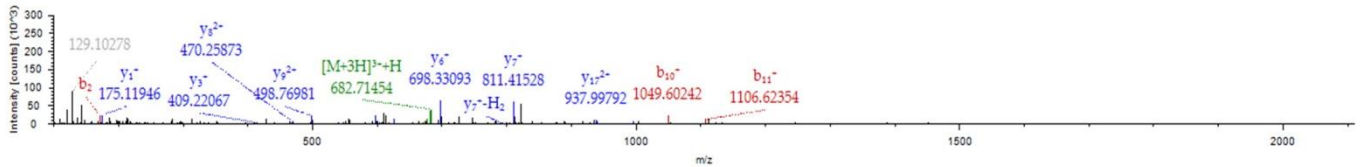

# IKDSKTLLLGEKPVTVFGIR

z=+4, Mono m/z=554.33820 Da, MH+=2214.33095 Da, Match Tol.=0.02 Da

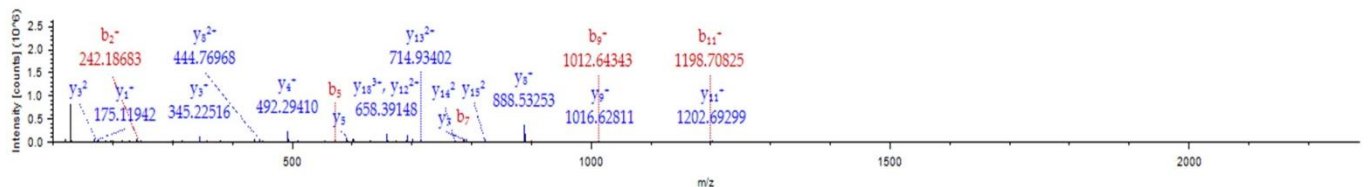

# IKDSK(ac)TLLLGEKPVTVFGIR

z=+3, Mono m/z=752.78357 Da, MH+=2256.33615 Da, Match Tol.=0.02 Da

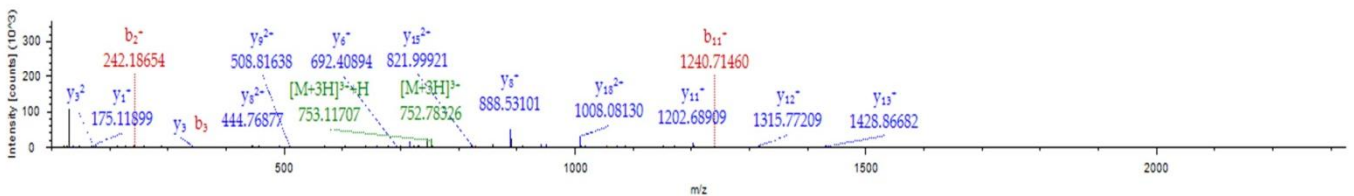

# IKIGINGFGR

z=+2, Mono m/z=537.82678 Da, MH+=1074.64629 Da, Match Tol.=0.02 Da

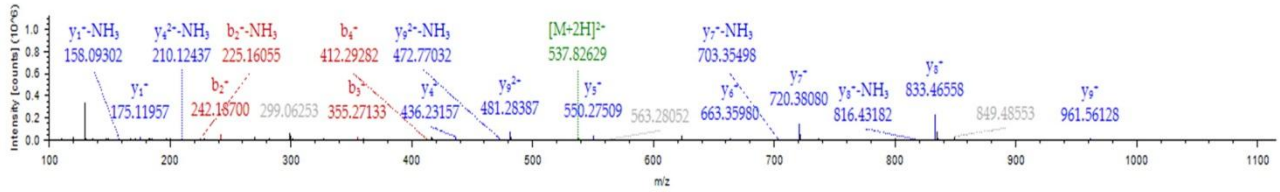

# IK(ac) IGINGFGR

z=+2, Mono m/z=558.83118 Da, MH+=1116.65508 Da, Match Tol.=0.02 Da

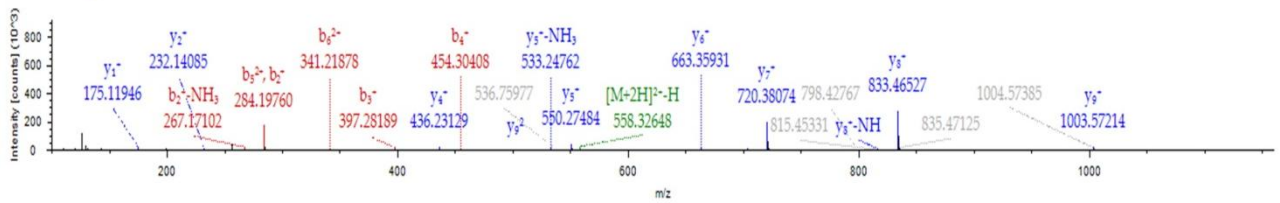

# KVVISAPSK

z=+2, Mono m/z=464.79691 Da, MH+=928.58653 Da, Match Tol.=0.02 Da

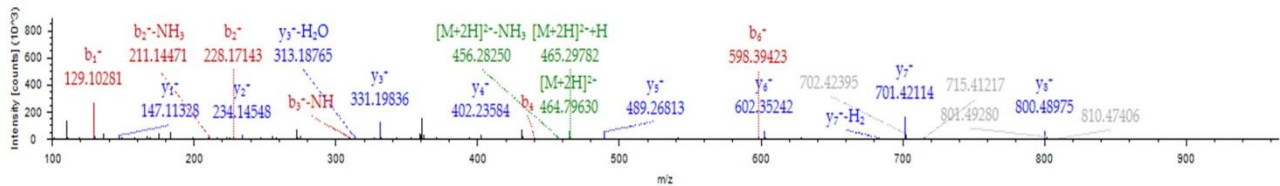

# K(ac) VVISAPSK

z=+2, Mono m/z=485.80200 Da, MH+=970.59673 Da, Match Tol.=0.02 Da

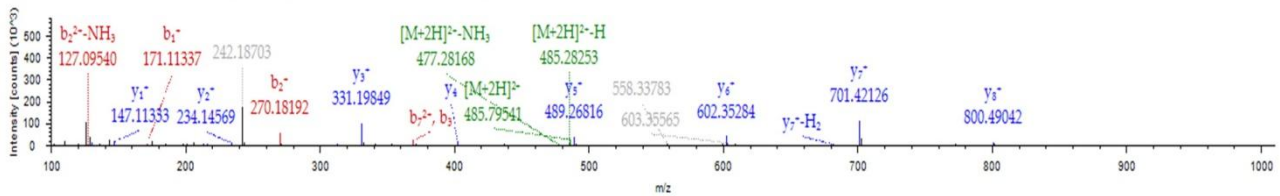

# LKGIIGYVEEDLVSTDFVGDSR

z=+3, Mono m/z=804.75153 Da, MH+=2412.24002 Da, Match Tol.=0.02 Da

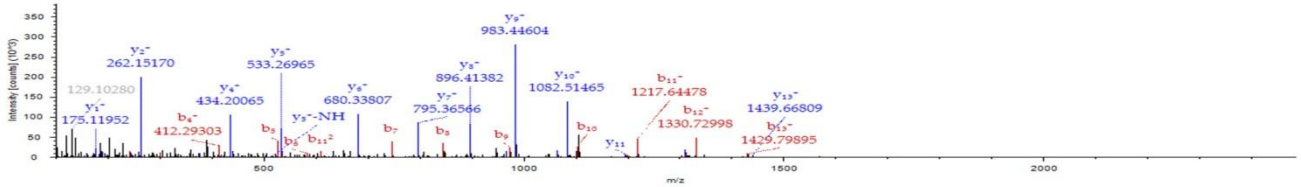

# LK(ac)GIIGYVEEDLVSTDFVGDSR

z=+2, Mono m/z=1227.63025 Da, MH+=2454.25322 Da, Match Tol.=0.02 Da

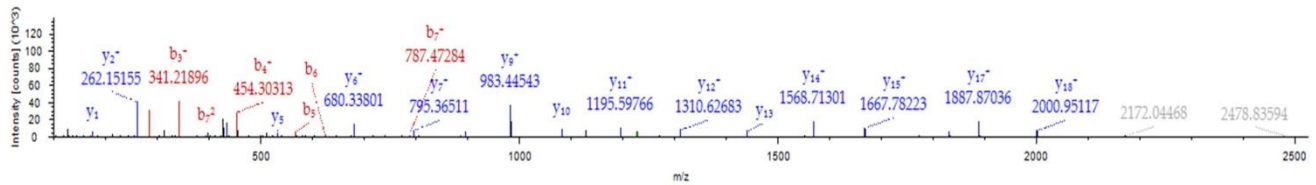

# SAIKSASEGKLK

z=+3, Mono m/z=406.90677 Da, MH+=1218.70575 Da, Match Tol.=0.02 Da

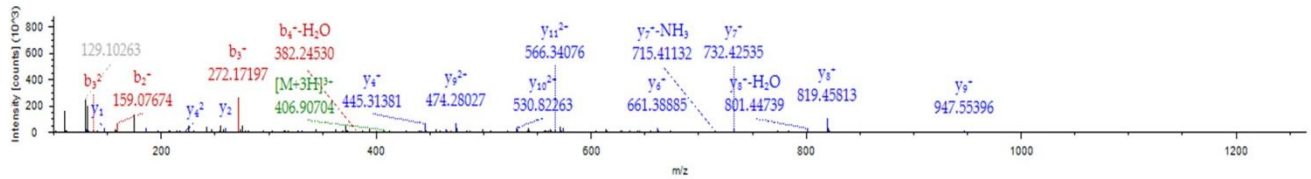

# SAIK(ac)SASEGKLK

z=+2, Mono m/z=630.86322 Da, MH+=1260.71916 Da, Match Tol.=0.02 Da

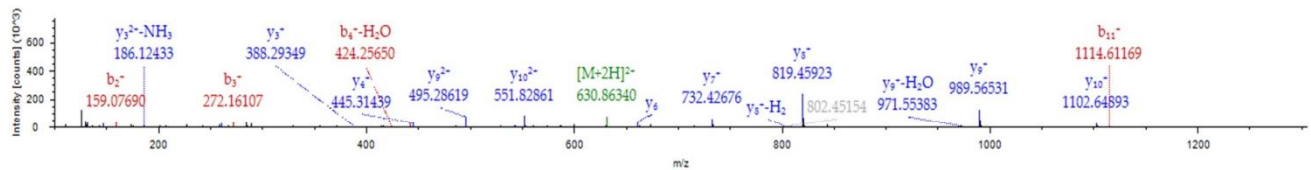

# NPDEIPWAEAGA EYVVESTGVFTDKEK

z=+3, Mono m/z=994.47491 Da, MH+=2981.41019 Da, Match Tol.=0.02 Da

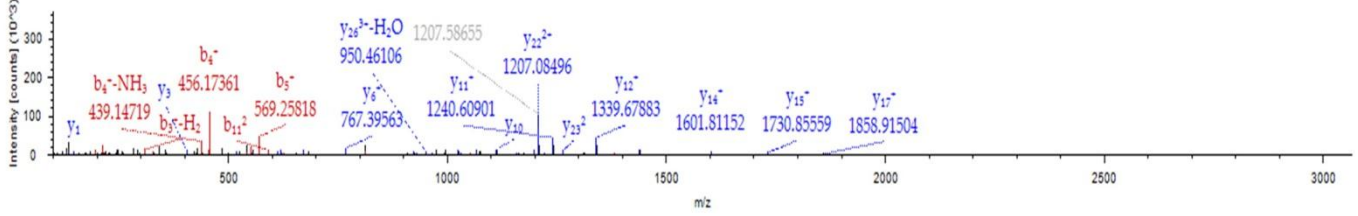

# NPDEIPWAEAGA EYVVESTGVFTDK (ac) EK

z=+3, Mono m/z=1008.48315 Da, MH+=3023.43491 Da, Match Tol.=0.02 Da

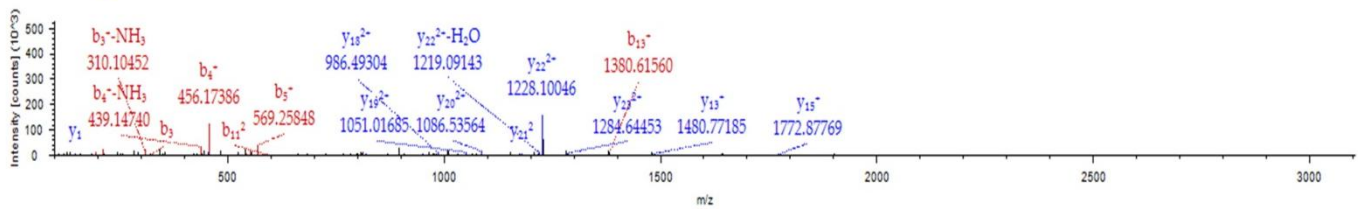

# AASYDAIKSAIK

z=+2, Mono m/z=619.34430 Da, MH+=1237.68132 Da, Match Tol.=0.02 Da

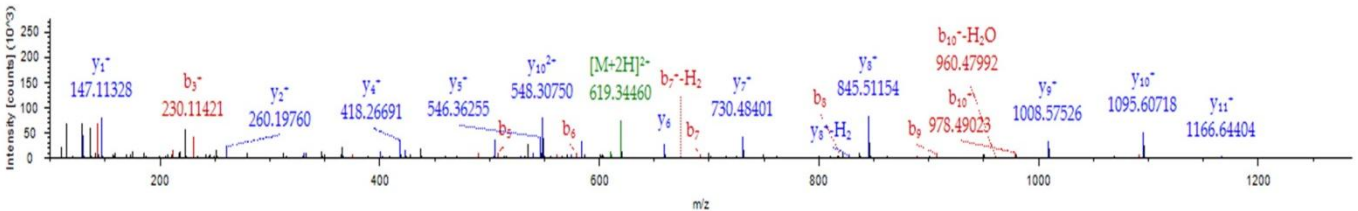

# AASYDAIK (ac) SAIK

z=+2, Mono m/z=640.35095 Da, MH+=1279.69463 Da, Match Tol.=0.02 Da

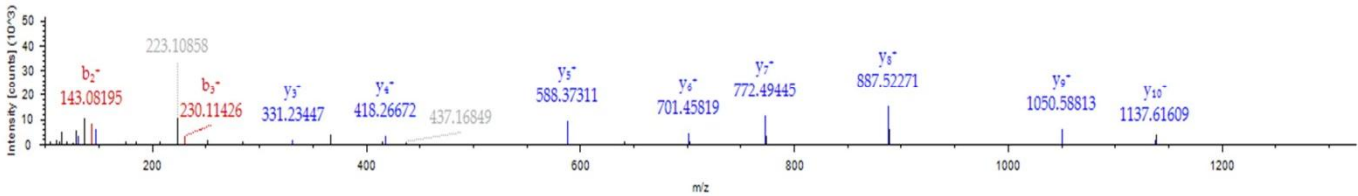



# TLLLGEKPVTVFGIR

z=+3, Mono m/z=548.33594 Da, MH+=1642.99326 Da, Match Tol.=0.02 Da

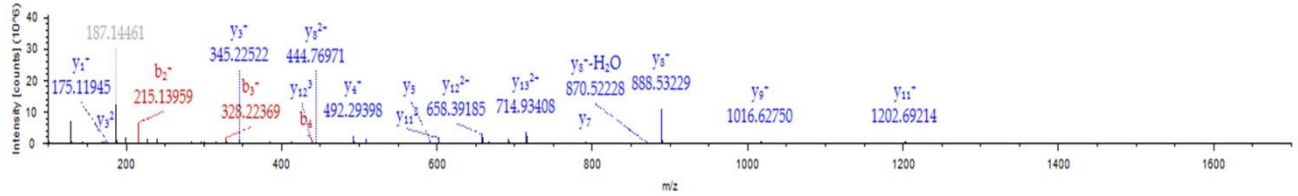

# TLLLGEK (ac) PVTVFGIR

z=+2, Mono m/z=843.00690 Da, MH+=1685.00652 Da, Match Tol.=0.02 Da

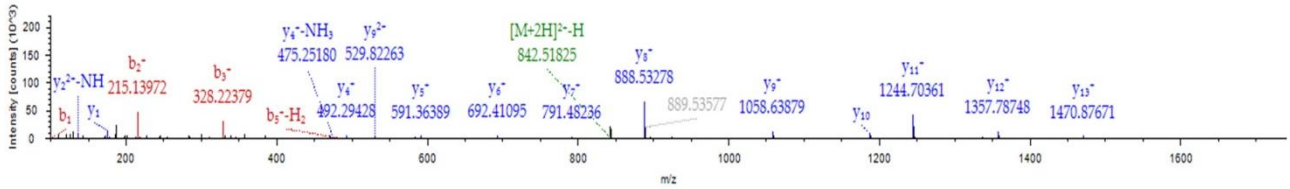

# TVDGPSSKDWR

z=+3, Mono m/z=416.53976 Da, MH+=1247.60474 Da, Match Tol.=0.02 Da

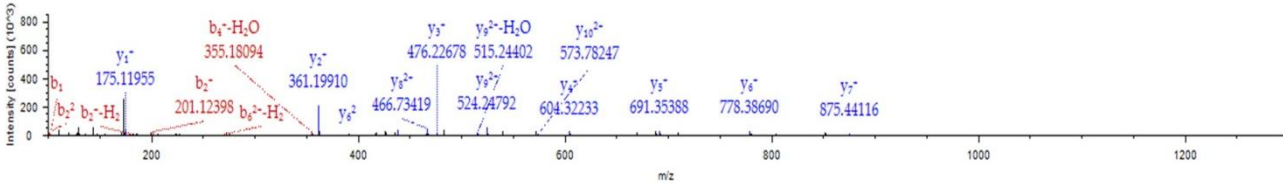

# TVDGPSSK (ac) DWR

z=+2, Mono m/z=645.31152 Da, MH+=1289.61577 Da, Match Tol.=0.02 Da

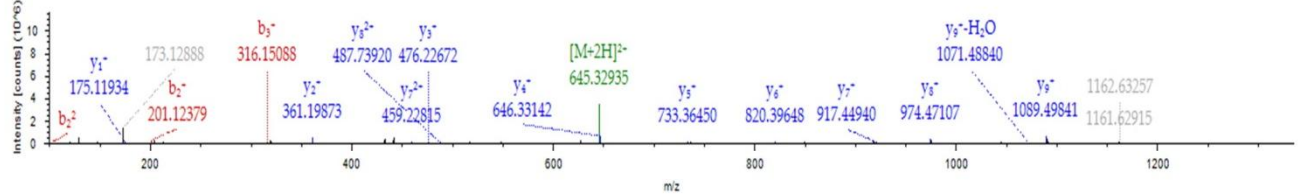

# VIHDNFGIIEGLMTTVHAITATQKTVDGPSSK

z=+4, Mono m/z=846.44012 Da, MH+=3382.73867 Da, Match Tol.=0.02 Da

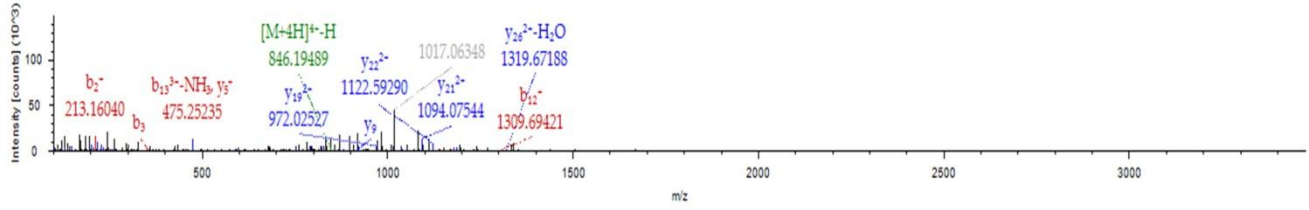

# VIHDNFGIIEGLMTTVHAITATQK(ac)TVDGPSSK

z=+4, Mono m/z=856.94379 Da, MH+=3424.75332 Da, Match Tol.=0.02 Da

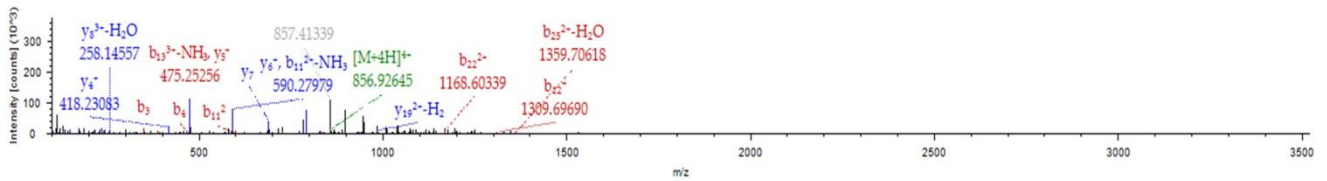

# VLPDLNGKLTGMSFR

z=+3, Mono m/z=555.30176 Da, MH+=1663.89072 Da, Match Tol.=0.02 Da

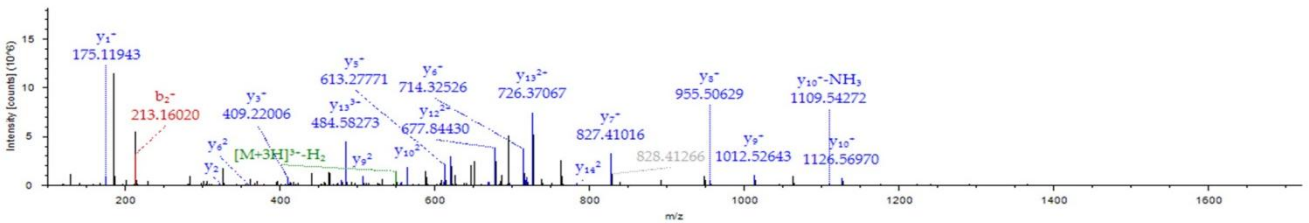

# VLPDLNGK(ac)LTGMSFR

z=+3, Mono m/z=569.30463 Da, MH+=1705.89933 Da, Match Tol.=0.02 Da

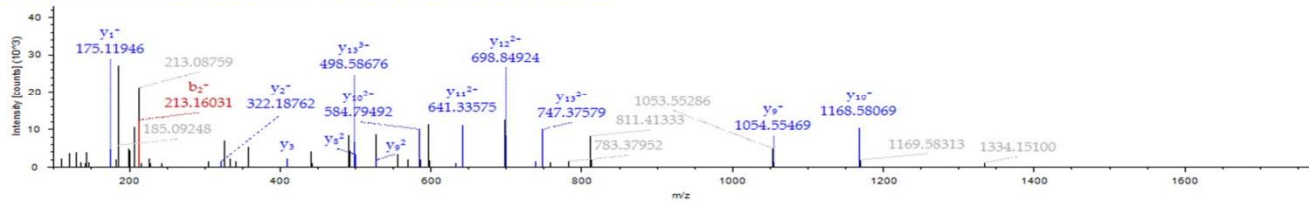

# VVISAPSKDAPMFVCGVNEDKYTSDIDIVSNASCTTNCLAPLAK

z=+4, Mono m/z=1190.33044 Da, MH+=4758.29995 Da, Match Tol.=0.02 Da

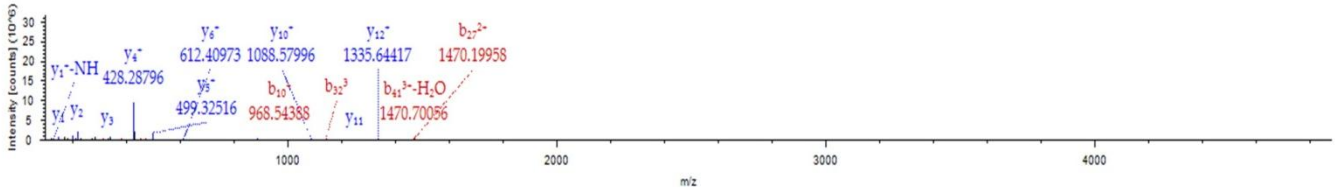

# VVISAPSKDAPMFVCGVNEDK (ac) YTSIDIDIVSNASCTTNCLAPLAK

z=+4, Mono m/z=1200.83789 Da, MH+=4800.32973 Da, Match Tol.=0.02 Da

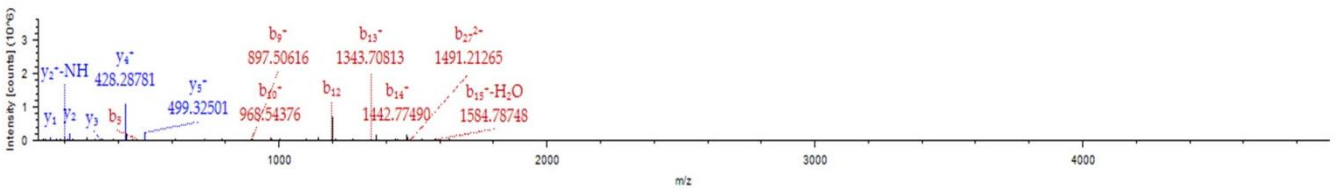

# YDTVHGQWKHSDIK

z=+2, Mono m/z=857.42371 Da, MH+=1713.84014 Da, Match Tol.=0.02 Da

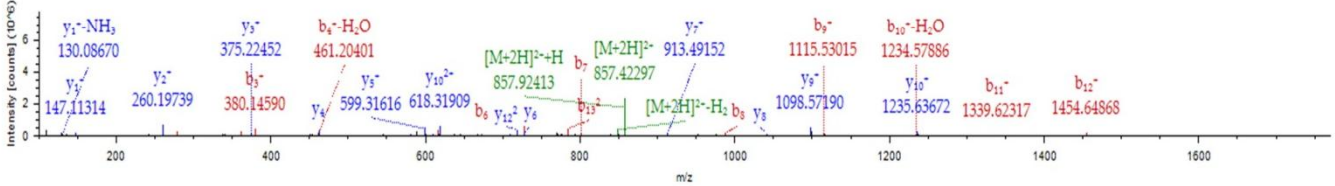

# YDTVHGQWK (ac) HSDIK

z=+3, Mono m/z=585.95520 Da, MH+=1755.85105 Da, Match Tol.=0.02 Da

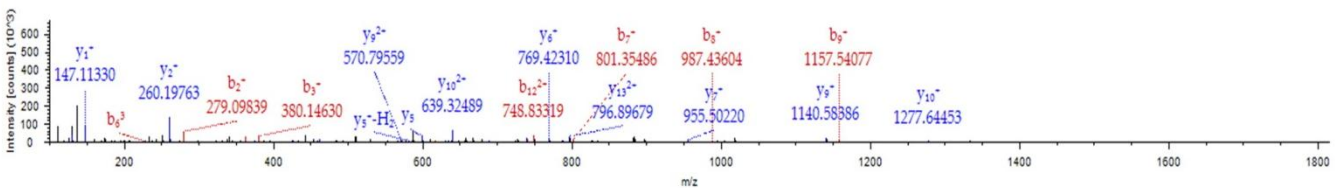

Supplement: gkx825_supp.pdf [file gkx825_supp.pdf]
